# Supplementary material for: Peste des Petits Ruminants (PPR) Vaccination Cost Estimates in Burkina Faso
Source: MDPI journal article supplement (doi:10.3390/ani12162152), 2022-08-22
Supplement: s1 [file s1]

### Cost calculation details by the nature of cost

Note: unit cost= total cost/number of animals vaccinated

- Variable cost
- Fixed cost

**Table S13.** Number of animals vaccinated in each level of vaccine distribution

| Vaccine distribution level   | Central   | Regional | Provincial | Communal | Private vets |
|------------------------------|-----------|----------|------------|----------|--------------|
| Number of vaccinated animals | 4,445,444 | 234,122  | 60,888     | 11,191   | 84,272       |

**Table S14.** Vaccine purchase cost calculation details

| Vaccine distribution level | Central     | Regional | Provincial | Communal | Private vets |
|----------------------------|-------------|----------|------------|----------|--------------|
| Fixed cost                 | 0           | 0        | 0          | 0        | 0            |
| Variable cost = a * b      | 105,846,022 | 0        | 0          | 0        | 0            |
| Vaccine unit price (a)     | 23.81       | n/a      | n/a        | n/a      | n/a          |
| Number of doses used (b)   | 4,445,444   | 234,122  | 60,888     | 11,191   | 84,272       |

**Table S15.** Details of fixed and variable vaccine transportation cost calculation

| Vaccine distribution level                                                             |                                                           | Central    | Regional   | Provincial | Communal  | Private vets |
|----------------------------------------------------------------------------------------|-----------------------------------------------------------|------------|------------|------------|-----------|--------------|
| Fixed cost                                                                             |                                                           | 0          | 0          | 0          | 0         | 0            |
| Variable cost = sub total1+ sub total2+ sub total3+ sub total4+ sub total5+ sub total6 |                                                           | 15,237,453 | 125,438    | 85,547     | 140,199   | 966,989      |
|                                                                                        | Number of supplies (a)                                    | 1          | 1          | 2          | 3         | 2            |
| <i>Import cost (sub total1) = b*c</i>                                                  |                                                           | 12,025,580 | 0          | 0          | 0         | 0            |
|                                                                                        | <i>Unit import cost (b)</i>                               | 2.45       | n/a        | n/a        | n/a       | n/a          |
|                                                                                        | <i>Number of doses used (c)</i>                           | 4,908,400  | 292,775    | 63,150     | 12,017    | 85,000       |
| <i>Mean of transportation cost (sub total2) = d/(e*360)*f*a + g*f*a</i>                |                                                           | 383,333    | 14,722     | 29,444     | 1,550     | 1,967        |
|                                                                                        | Mean of transportation price (d)                          | 50,000,000 | 25,000,000 | 25,000,000 | 1,500,000 | 1,500,000    |
|                                                                                        | Mean of transportation ULY (e)                            | 5          | 5          | 5          | 5         | 5            |
|                                                                                        | Number of days of transportation (f)                      | 12         | 1          | 1          | 1         | 1            |
|                                                                                        | Mean of transportation maintenance cost per day (g)       | 4,167      | 833        | 833        | 200       | 150          |
| <i>Fuel cost (sub total3)</i>                                                          |                                                           | 2,052,540  | 50,000     | 20,000     | 3,000     | 44,000       |
| <i>Personnel cost (sub total4) = i*k*h*a + i*j*h*a</i>                                 |                                                           | 764,000    | 57,667     | 33,333     | 9,500     | 56,667       |
|                                                                                        | No of people (h)                                          | 2          | 2          | 2          | 1         | 1            |
|                                                                                        | No of days of transportation (i)                          | 12         | 1          | 1          | 1         | 1            |
|                                                                                        | Per diem (j)                                              | 23,500     | 20,500     | 0          | 0         | 15,000       |
|                                                                                        | Daily salary (k)                                          | 8,333      | 8,333      | 8,333      | 6,333     | 13,333       |
| <i>Field transportation cost (sub total5) = l/(m*360)*p*q + o*p*q + n*p*q</i>          |                                                           | 0          | 0          | 0          | 125,250   | 859,200      |
|                                                                                        | Motorbike cost (l)                                        | n/a        | n/a        | n/a        | 1,500,000 | 1,500,000    |
|                                                                                        | Motorbike ULY (m)                                         | n/a        | n/a        | n/a        | 5         | 5            |
|                                                                                        | Fuel cost per day (n)                                     | n/a        | n/a        | n/a        | 1,750     | 2,000        |
|                                                                                        | Field mean of transportation maintenance cost per day (o) | n/a        | n/a        | n/a        | 200       | 150          |
|                                                                                        | No of days of field transportation (p)                    | n/a        | n/a        | n/a        | 45        | 48           |
|                                                                                        | No of vaccination teams (q)                               | n/a        | n/a        | n/a        | 1         | 6            |
| <i>Other cost (sub total6) = r/(s*360)*a*i+t*a*i+u*a*i+v*a*i</i>                       |                                                           | 12,000     | 3,049      | 2,769      | 899       | 5,156        |
|                                                                                        | Cold box price (r)                                        | 0          | 35,000     | 25,000     | 71,420    | 20,000       |
|                                                                                        | Cold box ULY (s)                                          | 2          | 2          | 2          | 2         | 2            |
|                                                                                        | Tool fees (t)                                             | 0          | 1,000      | 400        | 0         | 800          |

|                             |       |       |     |     |       |
|-----------------------------|-------|-------|-----|-----|-------|
| Ice (u)                     | 0     | 1,500 | 200 | 0   | 500   |
| Phone call cost per day (v) | 1,000 | 500   | 750 | 500 | 1,250 |

**Table S16.** Details of fixed and variable vaccine storage cost calculation

| Vaccine distribution level                                                                                                                                                  | Central    | Regional | Provincial | Communal | Private vets |
|-----------------------------------------------------------------------------------------------------------------------------------------------------------------------------|------------|----------|------------|----------|--------------|
| Variable cost                                                                                                                                                               | 0          | 0        | 0          | 0        | 0            |
| Fixed = sub total1+ sub total2+ sub total3+ sub total4+ sub total5+ sub total6                                                                                              | 23,474,285 | 30,603   | 19,127     | 51,918   | 87,551       |
| <i>Sub total1 (Cold room cost) = <math>b/(d*360)*a*e*f + c*a*e*f</math></i>                                                                                                 | 5,580,000  | 0        | 0          | 0        | 0            |
| No of cold room (a)                                                                                                                                                         | 2          | n/a      | n/a        | n/a      | n/a          |
| Cold room building cost (b)                                                                                                                                                 | 25,000,000 | n/a      | n/a        | n/a      | n/a          |
| Maintenance cost per day (c)                                                                                                                                                | 1,667      | n/a      | n/a        | n/a      | n/a          |
| Cold room ULY (d)                                                                                                                                                           | 10         | n/a      | n/a        | n/a      | n/a          |
| Storage time in days (e)                                                                                                                                                    | 360        | n/a      | n/a        | n/a      | n/a          |
| Percentage of use for PPR (f)                                                                                                                                               | 1          | n/a      | n/a        | n/a      | n/a          |
| <i>Sub total2 (Refrigerator cost) = <math>h/(j*360)*g*k + h*g*k</math></i>                                                                                                  | 84,375     | 22,222   | 13,889     | 18,056   | 43,750       |
| No of Refrigerators (g)                                                                                                                                                     | 1          | 2        | 1          | 1        | 2            |
| Refrigerator price (h)                                                                                                                                                      | 1,500,000  | 500,000  | 500,000    | 500,000  | 500,000      |
| Refrigerator maintenance cost per day (2.5%) (i)                                                                                                                            | 104        | 0        | 0          | 0        | 35           |
| Refrigerator ULY (j)                                                                                                                                                        | 5          | 5        | 5          | 5        | 5            |
| Storage time in days (k)                                                                                                                                                    | 90         | 40       | 50         | 65       | 70           |
| <i>Sub total3 (Electricity cost for central) = <math>l*m*e*a*0.29 + l*n*e*a*0.71</math></i><br><i>Sub total3 (Electricity cost for other levels) = <math>l*m*k*g</math></i> | 17,809,910 | 8,381    | 5,238      | 6,809    | 14,666       |
| No of Kwh/day (l)                                                                                                                                                           | 224.2      | 0.97     | 0.97       | 0.97     | 0.97         |
| Cost of Kwh (peak moment) (m) <sup>1</sup>                                                                                                                                  | 165        | 108      | 108        | 108      | 108          |
| Cost of Kwh (full moment) (n)                                                                                                                                               | 88         |          |            |          |              |
| <i>Sub total4 (Gas cost) = <math>p/(360*q)*k + o*k</math></i>                                                                                                               | 0          | 0        | 0          | 27,053   | 29,134       |
| Gas recharging cost per month (o)                                                                                                                                           | 0          |          |            | 400      | 400          |

<sup>1</sup> For the central level, the cost is Kwh depends on the electricity consumption moment in the days. It is estimated that 29% of electricity consumed is done during the peak moment (10:00AM -2:00PM and 4:00 PM – 7:00 PM) and 71 percent during the full moment (other hours).

|                      |   |   |   |        |        |
|----------------------|---|---|---|--------|--------|
| Gas bottle price (p) | 0 | 1 | 1 | 17,500 | 17,500 |
| Gas bottle ULY (q)   | 1 | 1 | 1 | 3      | 3      |

<sup>1</sup> For the central level, the cost is Kwh depends on the electricity consumption moment in the days. It is estimated that 29% of electricity consumed in done during the peak moment (10:00AM -2:00PM and 4:00 PM – 7:00 PM) and 71 percent during the full moment (other times).

**Table S17.** Details of fixed and variable Vaccine field delivery cost calculation

| Vaccine distribution level                                                                                                                                             | Central | Regional | Provincial | Communal | Private vets |
|------------------------------------------------------------------------------------------------------------------------------------------------------------------------|---------|----------|------------|----------|--------------|
| Fixed cost = $e*b*a$                                                                                                                                                   | 0       | 0        | 0          | 300,000  | 0            |
| Variable cost = sub total1 + sub total2 + sub total3                                                                                                                   | 0       | 0        | 0          | 967,275  | 4,541,361    |
| <i>Sub total1 (Vaccinators cost for communal) = <math>d*c*b*a + e*b*a</math></i><br><i>Sub total1 (Vaccinators cost for private vets) = <math>(d*c*b*a) + e</math></i> | 0       | 0        | 0          | 870,000  | 4,213,600    |
| No of vaccination teams (a)                                                                                                                                            | n/a     | n/a      | n/a        | 1        | 6            |
| No of people per team (b)                                                                                                                                              | n/a     | n/a      | n/a        | 2        | 2            |
| No of working per team (c)                                                                                                                                             | n/a     | n/a      | n/a        | 45       | 48           |
| Daily salary (d)                                                                                                                                                       | n/a     | n/a      | n/a        | 6,333    | -            |
| Per diem (e)                                                                                                                                                           | n/a     | n/a      | n/a        | 150,000  | 4,213,600    |
| <i>Sub total2 (Vaccination material cost) = <math>(f/g + h/I + j/k + l/m)*n</math></i>                                                                                 | 0       | 0        | 0          | 34,133   | 214,894      |
| Vaccination syringe price (f)                                                                                                                                          | n/a     | n/a      | n/a        | 30,000   | 30,000       |
| No of doses supported (g)                                                                                                                                              | n/a     | n/a      | n/a        | 15,000   | 25,000       |
| Needle price (h)                                                                                                                                                       | n/a     | n/a      | n/a        | 250      | 250          |
| No of doses supported (i)                                                                                                                                              | n/a     | n/a      | n/a        | 1,000    | 1,000        |
| Spare glass price (j)                                                                                                                                                  | n/a     | n/a      | n/a        | 3,000    | 3,000        |
| No of doses supported (k)                                                                                                                                              | n/a     | n/a      | n/a        | 10,000   | 5,000        |
| Marking clamp (l)                                                                                                                                                      | n/a     | n/a      | n/a        | 10,000   | 10,000       |
| No of animal supported (m)                                                                                                                                             | n/a     | n/a      | n/a        | 20,000   | 20,000       |
| No of animal vaccinated (n)                                                                                                                                            | n/a     | n/a      | n/a        | 11,191   | 84,272       |
| <i>Sub total3 (Other field cost) = <math>o/(p*360)*a*c + q*a*c + r</math></i>                                                                                          |         | n/a      | n/a        | n/a      | 95,533       |
| Cold box price (o)                                                                                                                                                     | n/a     | n/a      | n/a        | 71,420   | 20,000       |
| Cold box ULY (p)                                                                                                                                                       | n/a     | n/a      | n/a        | 3        | 3            |

|                                            |           |           |        |        |        |
|--------------------------------------------|-----------|-----------|--------|--------|--------|
| Ice price per day (q)                      | n/a       | n/a       | n/a    | 150    | 275    |
| Phone call cost (r)                        | n/a       | n/a       | n/a    | 33,750 | 11,000 |
| <i>Sub total4 (Vaccine wastage)= s-t-u</i> | 8,755,675 | 1,396,528 | 53,858 | 19,667 | 17,334 |
| No of doses delivered (s)                  | 7,356,800 | 300,100   | 65,000 | 12,725 | 85,000 |
| No of vaccinated animal (t)                | 4,445,444 | 234,122   | 60,888 | 11,191 | 84,272 |
| No of doses available (u)                  | 2,448,400 | 7,325     | 1,850  | 708    | 0      |

**Table S18.** Details of fixed and variable sensitization cost calculation

| Vaccine distribution level                        |                                                                                                                                                              | Central    | Regional | Provincial | Communal  | Private vets |
|---------------------------------------------------|--------------------------------------------------------------------------------------------------------------------------------------------------------------|------------|----------|------------|-----------|--------------|
| Variable cost                                     |                                                                                                                                                              | 0          | 0        | 0          | 0         | 0            |
| Fixed cost = sub total1 + sub total2 + sub total3 |                                                                                                                                                              | 33,181,356 | 0        | 162,611    | 233,600   | 634,450      |
| Personnel cost                                    | <i>Sub total1 (central)= a*c*b*e + d</i><br><i>Sub total1 (provincial)= a*b*c*e + d*c*a</i><br><i>Sub total1 (communal and private vets) = a*b*c*e + d*a</i> | 10,775,500 | 0        | 113,333    | 161,333   | 274,667      |
|                                                   | No of people involved (a)                                                                                                                                    | 100        | n/a      | 2          | 2         | 2            |
|                                                   | No of days per session (b)                                                                                                                                   | 1          | n/a      | 1          | 1         | 1            |
|                                                   | No of sessions (c)                                                                                                                                           | 1          | n/a      | 2          | 8         | 13           |
|                                                   | Per diem (d)                                                                                                                                                 | 9,775,500  | n/a      | 20,000     | 30,000    | 55,000       |
|                                                   | Daily salary (e)                                                                                                                                             | 10,000     | n/a      | 8,333      | 6,333     | 6,333        |
| Material and other costs                          | <i>Sub total2 (central) = i/(360*j)*c*b*k + l + h + g + f + m</i><br><i>Sub total2 (others) = l/(360*j)*c*b + l*c*b + h*c*b + g*c*b + f*c*b + m</i>          | 9,350,856  | 0        | 49,278     | 56,267    | 194,783      |
|                                                   | Refreshment for farmers per session (f)                                                                                                                      | 3,310,000  | n/a      | 0          | 3,500     | 2,500        |
|                                                   | Phone call per session (g)                                                                                                                                   | 100,000    | n/a      | 0          | 500       | 1,500        |
|                                                   | Fuel cost (h)                                                                                                                                                | 2,822,000  | n/a      | 10,000     | 2,000     | 10,000       |
|                                                   | Mean of transportation price (i)                                                                                                                             | 50,000,000 | n/a      | 25,000,000 | 1,500,000 | 1,500,000    |
|                                                   | Mean of transportation price ULY (j)                                                                                                                         | 5          | n/a      | 5          | 5         | 5            |
|                                                   | Mean of transportation No (k)                                                                                                                                | 38         | n/a      | 1          | 1         | 1            |
|                                                   | Mean of transportation maintenance cost per day (15%) (l)                                                                                                    | 11,139     | n/a      | 750        | 200       | 150          |
|                                                   | Other materials (m)                                                                                                                                          | 1,640,000  | n/a      | 0          | 0         | 0            |
| Sub total3 = n + o + p + q + r                    |                                                                                                                                                              | 13,055,000 | 0        | 0          | 16,000    | 165,000      |

|                       |                                          |            |   |   |        |         |
|-----------------------|------------------------------------------|------------|---|---|--------|---------|
| Media broadcast costs | Town crier cost (n)                      | 30,000     | 0 | 0 | 16,000 | 65,000  |
|                       | Radio cost (o)                           | 12,000,000 | 0 | 0 | 0      | 100,000 |
|                       | Television cost (p)                      | 600,000    | 0 | 0 | 0      | 0       |
|                       | Newsletter cost (q)                      | 250,000    | 0 | 0 | 0      | 0       |
|                       | Other cost (interpreter and hostess) (r) | 175,000    | 0 | 0 | 0      | 0       |

**Table S19.** Details of fixed and variable supervision cost calculation

| Vaccine distribution level                          |                                                                                                                                       | Central    | Regional   | Provincial | Communal | Private vets |
|-----------------------------------------------------|---------------------------------------------------------------------------------------------------------------------------------------|------------|------------|------------|----------|--------------|
| Variable cost                                       |                                                                                                                                       | 0          | 0          | 0          | 0        | 0            |
| Fixed cost = sub total1 + sub total 2 + sub total 3 |                                                                                                                                       | 8,095,361  | 424,194    | 257,590    | 0        | 178,167      |
| Personnel cost                                      | <i>Sub total1 (central) = <math>b*a*d*e + c*a*d*e</math><br/>Sub total1 (others) = <math>b*a*d*e + c</math></i>                       | 4,440,000  | 275,000    | 143,333    | 0        | 133,333      |
|                                                     | No of days (a)                                                                                                                        | 5          | 1          | 1          | n/a      | 1            |
|                                                     | Daily salary (b)                                                                                                                      | 10,000     | 8,333      | 8,333      | n/a      | 13,333       |
|                                                     | Per diem (c)                                                                                                                          | 27,000     | 150,000    | 60,000     | n/a      | 0            |
|                                                     | No of people involved (d)                                                                                                             | 4          | 3          | 2          | n/a      | 1            |
|                                                     | No of sessions (e)                                                                                                                    | 6          | 5          | 5          | n/a      | 10           |
| Transportation cost                                 | <i>Sub total2 (central) = <math>f/(360*g)*a*e + h + i</math><br/>Sub total2 (others) = <math>f/(360*g)*a*e+h/360*e*a+i*e*a</math></i> | 3,193,651  | 144,194    | 108,257    | 0        | 34,833       |
|                                                     | Mean of transportation cost (f)                                                                                                       | 50,000,000 | 25,000,000 | 25,000,000 | n/a      | 1,500,000    |
|                                                     | Mean of transportation cost ULY (g)                                                                                                   | 5          | 5          | 5          | n/a      | 5            |
|                                                     | Mean of transportation maintenance cost (15%) (h)                                                                                     | 307,868    | 702,000    | 364,500    | n/a      | 54,000       |
|                                                     | Fuel cost (i)                                                                                                                         | 2,052,450  | 13,000     | 6,750      | n/a      | 2,500        |
| Other costs                                         | <i>Sub total 3 = <math>j + k</math></i>                                                                                               | 461,710    | 5,000      | 6,000      | 0        | 10,000       |
|                                                     | Phone call cost (j)                                                                                                                   | 61,710     | 5,000      | 6,000      | n/a      | 10,000       |
|                                                     | Vaccine shipment (k)                                                                                                                  | 400,000    | 0          | 0          | n/a      | 0            |

**Table S20.** Details of fixed and variable training and meetings cost calculation

| Vaccine distribution level           |                                                                       | Central    | Regional | Provincial | Communal | Private vets |
|--------------------------------------|-----------------------------------------------------------------------|------------|----------|------------|----------|--------------|
| Variable cost                        |                                                                       | 0          | 0        | 0          | 0        | 0            |
| Fixed cost = sub total1 + sub total2 |                                                                       | 34,560,054 | 0        | 0          | 0        |              |
| Review workshops                     | $Sub\ total1 = b + d + e + f + g + h + I + c*a*k + j/(360*m)*l*k + n$ | 12,007,122 | 0        | 0          | 0        |              |
|                                      | No of people (a)                                                      | 80         | n/a      | n/a        | n/a      | n/a          |
|                                      | Per diem (b)                                                          | 2,877,000  | n/a      | n/a        | n/a      | n/a          |
|                                      | Daily salary (c)                                                      | 10,000     | n/a      | n/a        | n/a      | n/a          |
|                                      | Cocktail (d)                                                          | 594,000    | n/a      | n/a        | n/a      | n/a          |
|                                      | Phone call (e)                                                        | 200,000    | n/a      | n/a        | n/a      | n/a          |
|                                      | Fuel cost (f)                                                         | 1,986,000  | n/a      | n/a        | n/a      | n/a          |
|                                      | Material (g)                                                          | 2,730,000  | n/a      | n/a        | n/a      | n/a          |
|                                      | Room rent (h)                                                         | -          | n/a      | n/a        | n/a      | n/a          |
|                                      | Media broad cast cost (i)                                             | 1,000,000  | n/a      | n/a        | n/a      | n/a          |
|                                      | Mean of transportation price (j)                                      | 50,000,000 | n/a      | n/a        | n/a      | n/a          |
|                                      | No of days (k)                                                        | 2          | n/a      | n/a        | n/a      | n/a          |
|                                      | Mean of transportation No (l)                                         | 13         | n/a      | n/a        | n/a      | n/a          |
|                                      | Mean of transportation ULY (m)                                        | 5          | n/a      | n/a        | n/a      | n/a          |
|                                      | Mean of transportation maintenance (15%) (n)                          | 297,900    | n/a      | n/a        | n/a      | n/a          |
| Animal marking training              | $Sub\ total2 = b + d + e + f + g + h + I + c*a + j/(360*m)*l*k + n$   | 22,552,932 | 0        | 0          | 0        |              |
|                                      | No of people (a)                                                      | 163        | n/a      | n/a        | n/a      | n/a          |
|                                      | Per diem (b)                                                          | 16,369,000 | n/a      | n/a        | n/a      | n/a          |
|                                      | Daily salary (c)                                                      | 6,333      | n/a      | n/a        | n/a      | n/a          |
|                                      | Cocktail (d)                                                          | 1,978,000  | n/a      | n/a        | n/a      | n/a          |
|                                      | Phone call (e)                                                        | 32,000     | n/a      | n/a        | n/a      | n/a          |
|                                      | Fuel cost (f)                                                         | 1,935,400  | n/a      | n/a        | n/a      | n/a          |
|                                      | material (g)                                                          | 252,000    | n/a      | n/a        | n/a      | n/a          |
|                                      | Room rent (h)                                                         | 275,000    | n/a      | n/a        | n/a      | n/a          |
|                                      | Media broad cast cost (i)                                             | -          | n/a      | n/a        | n/a      | n/a          |
|                                      | Mean of transportation price (j)                                      | 50,000,000 | n/a      | n/a        | n/a      | n/a          |
|                                      | No of days (k)                                                        | 14         | n/a      | n/a        | n/a      | n/a          |

|  |                                              |         |     |     |     |     |
|--|----------------------------------------------|---------|-----|-----|-----|-----|
|  | Mean of transportation No (l)                | 1       | n/a | n/a | n/a | n/a |
|  | Mean of transportation ULY (m)               | 5       | n/a | n/a | n/a | n/a |
|  | Mean of transportation maintenance (15%) (n) | 290,310 | n/a | n/a | n/a | n/a |

**Table S21.** Details of fixed and variable coordination cost calculation

| Vaccine distribution level                        |                                                             | Central   | Regional | Provincial | Communal | Private vets |
|---------------------------------------------------|-------------------------------------------------------------|-----------|----------|------------|----------|--------------|
| Variable cost                                     |                                                             | 0         | 0        | 0          | 0        | 0            |
| Total cost = sub total1 + sub total2 + sub total3 |                                                             | 4,509,630 | 155,167  | 122,875    | 0        | 548,625      |
| Personnel cost                                    | <i>Sub total1 = d*b*a*c</i>                                 | 800,000   | 125,000  | 93,750     | 0        | 450,000      |
|                                                   | No of people in the coordination (a)                        | 4         | 2        | 1          | n/a      | 1            |
|                                                   | No of working days (b)                                      | 40        | 20       | 30         | n/a      | 45           |
|                                                   | Percentage time spent on PPR vaccination (c)                | 0.50      | 0.38     | 0.38       | n/a      | 0.75         |
|                                                   | Daily salary (d)                                            | 10,000    | 8,333    | 8,333      | n/a      | 13,333       |
| Reporting cost                                    | <i>Sub total2 = g*e*h + f*e*h + i</i>                       | 3,680,000 | 20,000   | 11,000     | 0        | 19,750       |
|                                                   | No of people in reporting (e)                               | 11        | n/a      | n/a        | n/a      | n/a          |
|                                                   | Per dem (f)                                                 | 5,000     | n/a      | n/a        | n/a      | n/a          |
|                                                   | Daily salary (g)                                            | 10,000    | n/a      | n/a        | n/a      | n/a          |
|                                                   | No of working days (h)                                      | 22        | n/a      | n/a        | n/a      | n/a          |
|                                                   | Phone call cost (i)                                         | 50,000    | n/a      | n/a        | n/a      | n/a          |
| Other costs                                       | <i>Sub total3 = p*q*j + r*s*j + m/(360*n)*a*b*o + k + l</i> | 29,630    | 10,167   | 18,125     | 0        | 78,875       |
|                                                   | Campaign duration (j)                                       | 90        | 90       | 90         | n/a      | 60           |
|                                                   | Transportation cost (k)                                     | 0         | 6,000    | 10,000     | n/a      | 333          |
|                                                   | Phone call cost (l)                                         | 0         | 0        | 5,000      | n/a      | 10,000       |
|                                                   | Computer cost (m)                                           | 400,000   | 300,000  | 300,000    | n/a      | 300,000      |
|                                                   | Computer ULY (n)                                            | 3         | 3        | 3          | n/a      | 3            |
|                                                   | Computer percentage use for PPR (o)                         | 0.50      | 0.38     | 0.38       | n/a      | 0.75         |
|                                                   | Room rent (p)                                               | n/a       | n/a      | n/a        | n/a      | 2,067        |
|                                                   | PPR vaccination % in the room rent (q)                      | n/a       | n/a      | n/a        | n/a      | 0.25         |
|                                                   | Taxes dues (r)                                              | n/a       | n/a      | n/a        | n/a      | 1,250        |
|                                                   | PPR vaccination % in the turnover (s)                       | n/a       | n/a      | n/a        | n/a      | 0.18         |
