# Supplementary material for: Peste des Petits Ruminants (PPR) Vaccination Cost Estimates in Burkina Faso
Source: MDPI journal article supplement (doi:10.3390/ani12162152), 2022-08-22
Supplement: s1 [file s1]

## Total values calculation method

**Table S22.** Total cost calculation in the public channel

| Component cost | Central | Regional | Provincial | Commune | Total cost               |      |
|----------------|---------|----------|------------|---------|--------------------------|------|
| Component1     | a       | b        | c          | d       | $T1 = a*0.6 + b + c + d$ | (63) |
| Component n    | f       | g        | h          | i       | $Tn = f*0.6 + g + h + i$ | (64) |
| Total          |         |          |            |         | $T1 + T2 + \dots + Tn$   | (65) |

- 0.6 (60%) is the percentage of the animal vaccinated in the public channel
- a, b,...i are the average cost at a given distribution level

**Table S23.** Total cost calculation in the private channel

| Component cost | Central | Private vets | Total cost             |      |
|----------------|---------|--------------|------------------------|------|
| Component1     | a       | b            | $T1 = a*0.4 + b$       | (66) |
| Component n    | c       | d            | $Tn = c*0.4 + d$       | (67) |
| Total          |         |              | $T1 + T2 + \dots + Tn$ | (68) |

- 0.4 (40%) is the percentage of the animal vaccinated in the private channel
- a, b,... are the average cost at a given distribution level
