# Supplementary material for: Peste des Petits Ruminants (PPR) Vaccination Cost Estimates in Burkina Faso
Source: MDPI journal article supplement (doi:10.3390/ani12162152), 2022-08-22
Supplement: s1 [file s1]

### Cost calculation details by activities

Note: unit cost = total cost/number of animals vaccinated

- *Vaccine purchase*
- *Vaccine transportation*
- *Vaccine field delivery*
- *Sensitization*
- *Supervision*
- *Training and meetings*
- *Coordination*

**Table S1.** Number of animals vaccinated in each level of vaccine distribution

| Vaccine distribution level   | Central   | Regional | Provincial | Communal | Private vets |
|------------------------------|-----------|----------|------------|----------|--------------|
| Number of vaccinated animals | 4,445,444 | 234,122  | 60,888     | 11,191   | 84,272       |

**Table S2.** Vaccine purchase calculation details

| Vaccine distribution level | Central     | Regional | Provincial | Communal | Private vets |
|----------------------------|-------------|----------|------------|----------|--------------|
| <i>Total cost = a * b</i>  | 105,846,022 | 0        | 0          | 0        | 0            |
| Unit dose cost (a)         | 23.81       | n/a      | n/a        | n/a      | n/a          |
| Number of doses used (b)   | 4,445,444   | 234,122  | 60,888     | 11,191   | 84,272       |

**Table S3.** Vaccine transportation cost calculation details

| Vaccine distribution level                                                      | Central    | Regional   | Provincial | Communal  | Private vets |
|---------------------------------------------------------------------------------|------------|------------|------------|-----------|--------------|
| Total = sub total1+ sub total2 + sub total3+ sub total4+ sub total5+ sub total6 | 15,237,453 | 125,438    | 85,547     | 140,199   | 966,989      |
| Number of supplies (a)                                                          | 1          | 1          | 2          | 3         | 2            |
| Importation cost (sub total1) = $b*c$                                           | 12,025,580 | 0          | 0          | 0         | 0            |
| Unit importation cost (b)                                                       | 2.45       | n/a        | n/a        | n/a       | n/a          |
| Number of doses used (c)                                                        | 4,908,400  | 292,775    | 63,150     | 12,017    | 85,000       |
| Mean of transportation cost (sub total2) = $d/(e*360)*f*a + g*f*a$              | 383,333    | 14,722     | 29,444     | 1,550     | 1,967        |
| Mean of transportation price (d)                                                | 50,000,000 | 25,000,000 | 25,000,000 | 1,500,000 | 1,500,000    |
| Mean of transportation ULY (e)                                                  | 5          | 5          | 5          | 5         | 5            |
| Number of days of transportation (f)                                            | 12         | 1          | 1          | 1         | 1            |
| Mean of transportation maintenance cost per day (g)                             | 4,167      | 833        | 833        | 200       | 150          |
| Fuel cost (sub total3)                                                          | 2,052,540  | 50,000     | 20,000     | 3,000     | 44,000       |
| Personnel cost (sub total4) = $i*k*h*a + i*j*h*a$                               | 764,000    | 57,667     | 33,333     | 9,500     | 56,667       |
| No of people (h)                                                                | 2          | 2          | 2          | 1         | 1            |
| No of days of transportation (i)                                                | 12         | 1          | 1          | 1         | 1            |
| Per diem (j)                                                                    | 23,500     | 20,500     | 0          | 0         | 15,000       |
| Daily salary (k)                                                                | 8,333      | 8,333      | 8,333      | 6,333     | 13,333       |
| Field transportation cost (sub total5) = $l/(m*360)*p*q + o*p*q + n*p*q$        | 0          | 0          | 0          | 125,250   | 859,200      |
| Motorbike cost (l)                                                              | 1          | 1          | 1          | 1,500,000 | 1,500,000    |
| Motorbike ULY (m)                                                               | 1          | 1          | 1          | 5         | 5            |
| Fuel cost per day (n)                                                           | n/a        | n/a        | n/a        | 1,750     | 2,000        |
| Field mean of transportation aintenance cost per day (o)                        | n/a        | n/a        | n/a        | 200       | 150          |
| No of days of field transportation (p)                                          | 1          | n/a        | n/a        | 45        | 48           |
| No of vaccination teams (q)                                                     | n/a        | n/a        | n/a        | 1         | 6            |
| Other cost (sub total6) = $r/(s*360)*a*i+t*a*i+u*a*i+v*a*i$                     | 12,000     | 3,049      | 2,769      | 899       | 5,156        |
| Cold box price (r)                                                              | n/a        | 35,000     | 25,000     | 71,420    | 20,000       |
| Cold box ULY (s)                                                                | 2          | 2          | 2          | 2         | 2            |
| Tool fees (t)                                                                   | n/a        | 1,000      | 400        | -         | 800          |
| Ice (u)                                                                         | n/a        | 1,500      | 200        | -         | 500          |

|                             |       |     |     |     |       |
|-----------------------------|-------|-----|-----|-----|-------|
| Phone call cost per day (v) | 1,000 | 500 | 750 | 500 | 1,250 |
|-----------------------------|-------|-----|-----|-----|-------|

**Table S4.** Vaccine storage cost calculation details

| Vaccine distribution level                                                                  | Central    | Regional | Provincial | Communal | Private vets |
|---------------------------------------------------------------------------------------------|------------|----------|------------|----------|--------------|
| Total = sub total1+ sub total2+ sub total3+ sub total4+ sub total5+ sub total6              | 23,474,285 | 30,603   | 19,127     | 51,918   | 87,551       |
| <i>Sub total1 (Cold room cost) = <math>b/(d*360)*a*e*f + c*a*e*f</math></i>                 | 5,580,000  | 0        | 0          | 0        | 0            |
| No of cold room (a)                                                                         | 2          | n/a      | n/a        | n/a      | n/a          |
| Cold room building cost (b)                                                                 | 25,000,000 | n/a      | n/a        | n/a      | n/a          |
| Cold room maintenance cost per day (c)                                                      | 1,667      | n/a      | n/a        | n/a      | n/a          |
| Cold room ULY (d)                                                                           | 10         | n/a      | n/a        | n/a      | n/a          |
| Storage time in days (e)                                                                    | 360        | n/a      | n/a        | n/a      | n/a          |
| Percentage of use for PPR (f)                                                               | 1          | n/a      | n/a        | n/a      | n/a          |
| <i>Sub total2 (Refrigerator cost) = <math>h/(j*360)*g*k + h*g*k</math></i>                  | 84,375     | 22,222   | 13,889     | 18,056   | 43,750       |
| No of Refrigerators (g)                                                                     | 1          | 2        | 1          | 1        | 2            |
| Refrigerator price (h)                                                                      | 1,500,000  | 500,000  | 500,000    | 500,000  | 500,000      |
| Refrigerator maintenance cost per day (2.5%) (i)                                            | 104        |          |            |          | 35           |
| Refrigerator ULY (j)                                                                        | 5          | 5        | 5          | 5        | 5            |
| Storage time in days (k)                                                                    | 90         | 40       | 50         | 65       | 70           |
| <i>Sub total3 (Electricity cost for central) = <math>l*m*e*a*0.29 + l*n*e*a*0.71</math></i> |            |          |            |          |              |
| <i>Sub total3 (Electricity cost for other levels) = <math>l*m*k*g</math></i>                | 17,809,910 | 8,381    | 5,238      | 6,809    | 14,666       |
| No of Kwh/day (l)                                                                           | 224.2      | 0.97     | 0.97       | 0.97     | 0.97         |
| Cost of Kwh (peak moment) (m) <sup>1</sup>                                                  | 165        | 108      | 108        | 108      | 108          |
| Cost of Kwh (full moment) (n)                                                               | 88         | n/a      | n/a        | n/a      | n/a          |
| <i>Sub total4 (Gas cost) = <math>p/(360*q)*k + o*k</math></i>                               | 0          | 0        | 0          | 27,053   | 29,134       |
| Gas recharging cost per month (o)                                                           | 0          |          |            | 400      | 400          |
| Gas bottle price (p)                                                                        | 0          | 1        | 1          | 17,500   | 17,500       |

<sup>1</sup> For the central level, the cost is Kwh depends on the electricity consumption moment in the days. It is estimated that 29% of electricity consumed is done during the peak moment (10:00AM -2:00PM and 4:00 PM – 7:00 PM) and 71 percent during the full moment (other hours).

|                    |   |   |   |   |   |
|--------------------|---|---|---|---|---|
| Gas bottle ULY (q) | 1 | 1 | 1 | 3 | 3 |
|--------------------|---|---|---|---|---|

**Table S5.** Vaccine field delivery cost calculation details

| Vaccine distribution level                                                             | Central   | Regional  | Provincial | Communal | Private vets |
|----------------------------------------------------------------------------------------|-----------|-----------|------------|----------|--------------|
| Total = sub total1 + sub total2 + sub total3                                           | 0         | 0         | 0          | 967,275  | 4,541,361    |
| <i>Sub total1 (Vaccinators cost for communal) = <math>d*c*b*a + e*b*a</math></i>       |           |           |            |          |              |
| <i>Sub total1 (Vaccinators cost for private vets) = <math>(d*c*b*a) + e</math></i>     | 0         | 0         | 0          | 870,000  | 4,213,600    |
| No of vaccination teams (a)                                                            | n/a       | n/a       | n/a        | 1        | 6            |
| No of people per team (b)                                                              | n/a       | n/a       | n/a        | 2        | 2            |
| No of working per team (c)                                                             | n/a       | n/a       | n/a        | 45       | 48           |
| Daily salary (d)                                                                       | n/a       | n/a       | n/a        | 6,333    | -            |
| Per diem (e)                                                                           | n/a       | n/a       | n/a        | 150,000  | 4,213,600    |
| <i>Sub total2 (Vaccination material cost) = <math>(f/g + h/I + j/k + l/m)*n</math></i> | 0         | 0         | 0          | 34,133   | 214,894      |
| Vaccination syringe price (f)                                                          | n/a       | n/a       | n/a        | 30,000   | 30,000       |
| No of doses supported (g)                                                              | n/a       | n/a       | n/a        | 15,000   | 25,000       |
| Needle price (h)                                                                       | n/a       | n/a       | n/a        | 250      | 250          |
| No of doses supported (i)                                                              | n/a       | n/a       | n/a        | 1,000    | 1,000        |
| Spare glass price (j)                                                                  | n/a       | n/a       | n/a        | 3,000    | 3,000        |
| No of doses supported (k)                                                              | n/a       | n/a       | n/a        | 10,000   | 5,000        |
| Marking clamp (l)                                                                      | n/a       | n/a       | n/a        | 10,000   | 10,000       |
| No of animal supported (m)                                                             | n/a       | n/a       | n/a        | 20,000   | 20,000       |
| No of animal vaccinated (n)                                                            | n/a       | n/a       | n/a        | 11,191   | 84,272       |
| <i>Sub total3 (Other field cost) = <math>o/(p*360)*a*c + q*a*c + r</math></i>          |           | n/a       | n/a        | n/a      | 95,533       |
| Cold box price (o)                                                                     | n/a       | n/a       | n/a        | 71,420   | 20,000       |
| Cold box ULY (p)                                                                       | n/a       | n/a       | n/a        | 3        | 3            |
| Ice price per day (q)                                                                  | n/a       | n/a       | n/a        | 150      | 275          |
| Phone call cost (r)                                                                    | n/a       | n/a       | n/a        | 33,750   | 11,000       |
| <i>Sub total4 (Vaccine wastage)= <math>s-t-u</math></i>                                | 8,755,675 | 1,396,528 | 53,858     | 19,667   | 17,334       |
| No of doses delivered (s)                                                              | 7,356,800 | 300,100   | 65,000     | 12,725   | 85,000       |
| No of vaccinated animal (t)                                                            | 4,445,444 | 234,122   | 60,888     | 11,191   | 84,272       |

|                           |           |       |       |     |   |
|---------------------------|-----------|-------|-------|-----|---|
| No of doses available (u) | 2,448,400 | 7,325 | 1,850 | 708 | 0 |
|---------------------------|-----------|-------|-------|-----|---|

**Table S6.** Sensitization cost calculation details

| Vaccine distribution level                        |                                                                                                                                                                                  | Central    | Regional | Provincial | Communal  | Private vets |
|---------------------------------------------------|----------------------------------------------------------------------------------------------------------------------------------------------------------------------------------|------------|----------|------------|-----------|--------------|
| Total cost = sub total1 + sub total2 + sub total3 |                                                                                                                                                                                  | 33,181,356 | 0        | 162,611    | 233,600   | 634,450      |
| Personnel cost                                    | $Sub\ total1\ (central) = a * c * b * e + d$<br>$Sub\ total1\ (provincial) = a * b * c * e + d * c * a$<br>$Sub\ total1\ (communal\ and\ private\ vets) = a * b * c * e + d * a$ | 10,775,500 | 0        | 113,333    | 161,333   | 274,667      |
|                                                   | No of people involved (a)                                                                                                                                                        | 100        | n/a      | 2          | 2         | 2            |
|                                                   | No of days per session (b)                                                                                                                                                       | 1          | n/a      | 1          | 1         | 1            |
|                                                   | No of sessions (c)                                                                                                                                                               | 1          | n/a      | 2          | 8         | 13           |
|                                                   | Per diem (d)                                                                                                                                                                     | 9,775,500  | n/a      | 20,000     | 30,000    | 55,000       |
|                                                   | Daily salary (e)                                                                                                                                                                 | 10,000     | n/a      | 8,333      | 6,333     | 6,333        |
| Material and other costs                          | $Sub\ total2\ (central) = i / (360 * j) * c * b * k + l + h + g + f + m$<br>$Sub\ total2\ (others) = I / (360 * J) * c * b + l * c * b + h * c * b + g * c * b + f * c * b + m$  | 9,350,856  | 0        | 49,278     | 56,267    | 194,783      |
|                                                   | Refreshment for farmers per session (f)                                                                                                                                          | 3,310,000  | n/a      | 0          | 3,500     | 2,500        |
|                                                   | Phone call per session (g)                                                                                                                                                       | 100,000    | n/a      | 0          | 500       | 1,500        |
|                                                   | Fuel cost (h)                                                                                                                                                                    | 2,822,000  | n/a      | 10,000     | 2,000     | 10,000       |
|                                                   | Mean of transportation price (i)                                                                                                                                                 | 50,000,000 | n/a      | 25,000,000 | 1,500,000 | 1,500,000    |
|                                                   | Mean of transportation price ULY (j)                                                                                                                                             | 5          | n/a      | 5          | 5         | 5            |
|                                                   | Mean of transportation No (k)                                                                                                                                                    | 38         | n/a      | 1          | 1         | 1            |
|                                                   | Mean of transportation maintenance cost per day (15%) (l)                                                                                                                        | 11,139     | n/a      | 750        | 200       | 150          |
| Media broadcast costs                             | Other materials (m)                                                                                                                                                              | 1,640,000  | n/a      | 0          | 0         | 0            |
|                                                   | Sub total3 = n + o + p + q + r                                                                                                                                                   | 13,055,000 | 0        | 0          | 16,000    | 165,000      |
|                                                   | Town crier cost (n)                                                                                                                                                              | 30,000     | 0        | 0          | 16,000    | 65,000       |
|                                                   | Radio cost (o)                                                                                                                                                                   | 12,000,000 | 0        | 0          | 0         | 100,000      |
|                                                   | Television cost (p)                                                                                                                                                              | 600,000    | 0        | 0          | 0         | 0            |
|                                                   | Newsletter cost (q)                                                                                                                                                              | 250,000    | 0        | 0          | 0         | 0            |
|                                                   | Other cost (interpreter and hostess) (r)                                                                                                                                         | 175,000    | 0        | 0          | 0         | 0            |

**Table S7.** Supervision cost calculation details

| Vaccine distribution level                          |                                                                                                                 | Central    | Regional   | Provincial | Communal | Private vets |
|-----------------------------------------------------|-----------------------------------------------------------------------------------------------------------------|------------|------------|------------|----------|--------------|
| Total cost = sub total1 + sub total 2 + sub total 3 |                                                                                                                 | 8,095,361  | 424,194    | 257,590    | 0        | 178,167      |
| Personnel cost                                      | $Sub\ total1\ (central) = b*a*d*e + c*a*d*e$<br>$Sub\ total1\ (others) = b*a*d*e + c$                           | 4,440,000  | 275,000    | 143,333    | 0        | 133,333      |
|                                                     | No of days (a)                                                                                                  | 5          | 1          | 1          | n/a      | 1            |
|                                                     | Daily salary (b)                                                                                                | 10,000     | 8,333      | 8,333      | n/a      | 13,333       |
|                                                     | Per diem (c)                                                                                                    | 27,000     | 150,000    | 60,000     | n/a      | 0            |
|                                                     | No of people involved (d)                                                                                       | 4          | 3          | 2          | n/a      | 1            |
|                                                     | No of sessions (e)                                                                                              | 6          | 5          | 5          | n/a      | 10           |
| Transportation cost                                 | $Sub\ total2\ (central) = f/(360*g)*a*e + h + i$<br>$Sub\ total2\ (others) = f/(360*g)*a*e + h/360*e*a + i*e*a$ | 3,193,651  | 144,194    | 108,257    | 0        | 34,833       |
|                                                     | Mean of transportation cost (f)                                                                                 | 50,000,000 | 25,000,000 | 25,000,000 | n/a      | 1,500,000    |
|                                                     | Mean of transportation cost ULY (g)                                                                             | 5          | 5          | 5          | n/a      | 5            |
|                                                     | Mean of transportation maintenance cost (15%) (h)                                                               | 307,868    | 702,000    | 364,500    | n/a      | 54,000       |
|                                                     | Fuel cost (i)                                                                                                   | 2,052,450  | 13,000     | 6,750      | n/a      | 2,500        |
| Other costs                                         | $Sub\ total\ 3 = j + k$                                                                                         | 461,710    | 5,000      | 6,000      | 0        | 10,000       |
|                                                     | Phone call cost (j)                                                                                             | 61,710     | 5,000      | 6,000      | n/a      | 10,000       |
|                                                     | Vaccine shipment (k)                                                                                            | 400,000    | 0          | 0          | n/a      | 0            |

**Table S8.** Training and meetings cost calculation details

| Vaccine distribution level           |                                                                           | Central    | Regional | Provincial | Communal | Private vets |
|--------------------------------------|---------------------------------------------------------------------------|------------|----------|------------|----------|--------------|
| Total cost = sub total1 + sub total2 |                                                                           | 34,560,054 | 0        | 0          | 0        |              |
| Review workshops                     | <i>Sub total1 = b + d + e + f + g + h + I + c*a*k + j/(360*m)*l*k + n</i> | 12,007,122 | 0        | 0          | 0        |              |
|                                      | No of people (a)                                                          | 80         | n/a      | n/a        | n/a      | n/a          |
|                                      | Per diem (b)                                                              | 2,877,000  | n/a      | n/a        | n/a      | n/a          |
|                                      | Daily salary (c)                                                          | 10,000     | n/a      | n/a        | n/a      | n/a          |
|                                      | Cocktail (d)                                                              | 594,000    | n/a      | n/a        | n/a      | n/a          |
|                                      | Phone call (e)                                                            | 200,000    | n/a      | n/a        | n/a      | n/a          |
|                                      | Fuel cost (f)                                                             | 1,986,000  | n/a      | n/a        | n/a      | n/a          |
|                                      | Material (g)                                                              | 2,730,000  | n/a      | n/a        | n/a      | n/a          |
|                                      | Room rent (h)                                                             | -          | n/a      | n/a        | n/a      | n/a          |
|                                      | Media broad cast cost (i)                                                 | 1,000,000  | n/a      | n/a        | n/a      | n/a          |
|                                      | Mean of transportation price (j)                                          | 50,000,000 | n/a      | n/a        | n/a      | n/a          |
|                                      | No of days (k)                                                            | 2          | n/a      | n/a        | n/a      | n/a          |
|                                      | Mean of transportation No (l)                                             | 13         | n/a      | n/a        | n/a      | n/a          |
|                                      | Mean of transportation ULY (m)                                            | 5          | n/a      | n/a        | n/a      | n/a          |
|                                      | Mean of transportation maintenance (15%) (n)                              | 297,900    | n/a      | n/a        | n/a      | n/a          |
| Animal marking training              | <i>Sub total2 = b + d + e + f + g + h + I + c*a + j/(360*m)*l*k + n</i>   | 22,552,932 | 0        | 0          | 0        |              |
|                                      | No of people (a)                                                          | 163        | n/a      | n/a        | n/a      | n/a          |
|                                      | Per diem (b)                                                              | 16,369,000 | n/a      | n/a        | n/a      | n/a          |
|                                      | Daily salary (c)                                                          | 6,333      | n/a      | n/a        | n/a      | n/a          |
|                                      | Cocktail (d)                                                              | 1,978,000  | n/a      | n/a        | n/a      | n/a          |
|                                      | Phone call (e)                                                            | 32,000     | n/a      | n/a        | n/a      | n/a          |
|                                      | Fuel cost (f)                                                             | 1,935,400  | n/a      | n/a        | n/a      | n/a          |
|                                      | material (g)                                                              | 252,000    | n/a      | n/a        | n/a      | n/a          |
|                                      | Room rent (h)                                                             | 275,000    | n/a      | n/a        | n/a      | n/a          |
|                                      | Media broad cast cost (i)                                                 | -          | n/a      | n/a        | n/a      | n/a          |
|                                      | Mean of transportation price (j)                                          | 50,000,000 | n/a      | n/a        | n/a      | n/a          |
|                                      | No of days (k)                                                            | 14         | n/a      | n/a        | n/a      | n/a          |
|                                      | Mean of transportation No (l)                                             | 1          | n/a      | n/a        | n/a      | n/a          |
|                                      | Mean of transportation ULY (m)                                            | 5          | n/a      | n/a        | n/a      | n/a          |
|                                      | Mean of transportation maintenance (15%) (n)                              | 290,310    | n/a      | n/a        | n/a      | n/a          |

**Table S9.** Coordination cost calculation details

| Vaccine distribution level                        |                                                            | Central   | Regional | Provincial | Communa<br>l | Private vets |
|---------------------------------------------------|------------------------------------------------------------|-----------|----------|------------|--------------|--------------|
| Total cost = sub total1 + sub total2 + sub total3 |                                                            | 4,509,630 | 155,167  | 122,875    | 0            | 548,625      |
| Personnel cost                                    | <i>Sub total1 = d*b*a*c</i>                                | 800,000   | 125,000  | 93,750     | 0            | 450,000      |
|                                                   | No of people in the coordination (a)                       | 4         | 2        | 1          | n/a          | 1            |
|                                                   | No of working days (b)                                     | 40        | 20       | 30         | n/a          | 45           |
|                                                   | Percentage time spent on PPR vaccination (c)               | 0.50      | 0.38     | 0.38       | n/a          | 0.75         |
|                                                   | Daily salary (d)                                           | 10,000    | 8,333    | 8,333      | n/a          | 13,333       |
| Reporting cost                                    | <i>Sub total2 =g*e*h + f*e*h + i</i>                       | 3,680,000 | 20,000   | 11,000     | 0            | 19,750       |
|                                                   | No of people in reporting (e)                              | 11        | n/a      | n/a        | n/a          | n/a          |
|                                                   | Per dem (f)                                                | 5,000     | n/a      | n/a        | n/a          | n/a          |
|                                                   | Daily salary (g)                                           | 10,000    | n/a      | n/a        | n/a          | n/a          |
|                                                   | No of working days (h)                                     | 22        | n/a      | n/a        | n/a          | n/a          |
|                                                   | Phone call cost (i)                                        | 50,000    | n/a      | n/a        | n/a          | n/a          |
| Other costs                                       | <i>Sub total3 =p*q*j + r*s*j + m/(360*n)*a*b*o + k + l</i> | 29,630    | 10,167   | 18,125     | 0            | 78,875       |
|                                                   | Campaign duration (j)                                      | 90        | 90       | 90         | n/a          | 60           |
|                                                   | Transportation cost (k)                                    | 0         | 6,000    | 10,000     | n/a          | 333          |
|                                                   | Phone call cost (l)                                        | 0         |          | 5,000      | n/a          | 10,000       |
|                                                   | Computer cost (m)                                          | 400,000   | 300,000  | 300,000    | n/a          | 300,000      |
|                                                   | Computer ULY (n)                                           | 3         | 3        | 3          | n/a          | 3            |
|                                                   | Computer percentage use for PPR (o)                        | 0.50      | 0.38     | 0.38       | n/a          | 0.75         |
|                                                   | Room rent (p)                                              | n/a       | n/a      | n/a        | n/a          | 2,067        |
|                                                   | PPR vaccination % in the room rent (q)                     | n/a       | n/a      | n/a        | n/a          | 0.25         |
|                                                   | Taxes dues (r)                                             | n/a       | n/a      | n/a        | n/a          | 1,250        |
|                                                   | PPR vaccination % in the turnover (s)                      | n/a       | n/a      | n/a        | n/a          | 0.18         |
