# Supplementary material for: Peste des Petits Ruminants (PPR) Vaccination Cost Estimates in Burkina Faso
Source: MDPI journal article supplement (doi:10.3390/ani12162152), 2022-08-22
Supplement: s1 [file s1]

## Cost calculation details by inputs

Note: unit cost= total cost/number of animals vaccinated

- *Personnel cost*
- *Vaccines*
- *Material and logistic*
- *Overhead*
- *Vaccine wastage*

**Table S10.** Personnel cost calculation details

| Vaccine distribution level                                                                                |                                                       | Central    | Regional | Provincial | Communal  | Private vets |
|-----------------------------------------------------------------------------------------------------------|-------------------------------------------------------|------------|----------|------------|-----------|--------------|
| Personnel cost = sub total1 + sub total2 + sub total3 + sub total4 + sub total5 + sub total6 + sub total7 |                                                       | 48,169,833 | 457,667  | 383,750    | 1,068,833 | 5,225,767    |
| For vaccine transportation                                                                                | <i>Sub total1 = (c + d) *a*b*e</i>                    | 764,000    | 57,667   | 33,333     | 9,500     | 56,667       |
|                                                                                                           | No of people (a)                                      | 2          | 2        | 2          | 1         | 1            |
|                                                                                                           | No of days of transportation (b)                      | 12         | 1        | 1          | 0.5       | 1            |
|                                                                                                           | Per diem (c)                                          | 23,500     | 20,500   | 0          | 0         | 15,000       |
|                                                                                                           | Daily salary (d)                                      | 8,333      | 8,333    | 8,333      | 6,333     | 13,333       |
|                                                                                                           | Supply number (e)                                     | 1          | 1        | 2          | 3         | 2            |
| For vaccine storage                                                                                       | <i>Sub total2</i>                                     | 0          | 0        | 0          | 0         | 0            |
| For vaccine field delivery                                                                                | <i>Sub total3 (communal) = (i*h*g*f) + (j*g*f)</i>    | 0          | 0        | 0          | 870,000   | n/a          |
|                                                                                                           | <i>Sub total3 (private vets) = (f*g*h*i) + j</i>      |            |          |            | n/a       | 4,213,600    |
|                                                                                                           | No of vaccination teams (f)                           | n/a        | n/a      | n/a        | 1         | 6            |
|                                                                                                           | No of people per team (g)                             | n/a        | n/a      | n/a        | 2         | 2            |
|                                                                                                           | No of working days per team (h)                       | n/a        | n/a      | n/a        | 45        | 48           |
|                                                                                                           | Daily salary (i)                                      | n/a        | n/a      | n/a        | 6,333     | 0            |
|                                                                                                           | Per diem (j)                                          | n/a        | n/a      | n/a        | 150,000   | 4,213,600    |
| For sensitization                                                                                         | <i>Sub total4 (central)= n + o*k*m*l + p*m</i>        | 14,085,500 | n/a      | n/a        | n/a       | n/a          |
|                                                                                                           | <i>Sub total4 (provincial)= k*l*m*o + n*m*k + p*m</i> | n/a        | n/a      | 113,333    | 0         | 0            |

|                           |                                                                 |            |         |         |         |         |
|---------------------------|-----------------------------------------------------------------|------------|---------|---------|---------|---------|
|                           | <i>Sub total4 (communal, private vets)= k*1*m*o + n*k + p*m</i> | 0          | 0       | 0       | 189,333 | 372,167 |
|                           | No of people involved (k)                                       | 100        | n/a     | 2       | 2       | 2       |
|                           | No of days per session (l)                                      | 1          | n/a     | 1       | 1       | 1       |
|                           | No of sessions (m)                                              | 1          | n/a     | 2       | 8       | 13      |
|                           | Per diem (n)                                                    | 9,775,500  | n/a     | 20,000  | 30,000  | 55,000  |
|                           | Daily salary (o)                                                | 10,000     | 8,333   | 8,333   | 6,333   | 6,333   |
|                           | Refreshment per session (p)                                     | 3,310,000  | 0       | 0       | 3,500   | 7,500   |
| For supervision           | <i>Sub total5 (central) = s*q*u*t + r*q*u*t</i>                 | 4,440,000  |         |         |         |         |
|                           | <i>Sub total5 (others) = s + q*t*u*r</i>                        |            | 275,000 | 143,333 | 0       | 133,333 |
|                           | No of days of supervision (q)                                   | 5          | 1       | 1       | n/a     | 1       |
|                           | Daily salary (r)                                                | 10,000     | 8,333   | 8,333   | n/a     | 13,333  |
|                           | Per diem (s)                                                    | 27,000     | 150,000 | 60,000  | n/a     | 0       |
|                           | No of people involved (t)                                       | 4          | 3       | 2       | n/a     | 1       |
|                           | No of supervision sessions (u)                                  | 6          | 5       | 5       | n/a     | 10      |
| For training and meetings | <i>Sub total6 = b1+g1+c1*a1*e1+h1*f1+d1+i1</i>                  | 24,450,333 | 0       | 0       | 0       | 0       |
|                           | <i>Review workshop</i>                                          |            | n/a     | n/a     | n/a     | n/a     |
|                           | No of people (a1)                                               | 80         | n/a     | n/a     | n/a     | n/a     |
|                           | Per diem (b1)                                                   | 2,877,000  | n/a     | n/a     | n/a     | n/a     |
|                           | Daily salary (c1)                                               | 10,000     | n/a     | n/a     | n/a     | n/a     |
|                           | Refreshment (d1)                                                | 594,000    | n/a     | n/a     | n/a     | n/a     |
|                           | No of days (e1)                                                 | 2          | n/a     | n/a     | n/a     | n/a     |
|                           | <i>Animal marking training</i>                                  |            | n/a     | n/a     | n/a     | n/a     |
|                           | No of people (f1)                                               | 163        | n/a     | n/a     | n/a     | n/a     |
|                           | Per diem (g1)                                                   | 16,369,000 | n/a     | n/a     | n/a     | n/a     |
|                           | Daily salary (h1)                                               | 6,333      | n/a     | n/a     | n/a     | n/a     |
|                           | Refreshment (i1)                                                | 1,978,000  | n/a     | n/a     | n/a     | n/a     |
| For coordination          | <i>Sub total7= n1*k1*j1+m1*l1*k1*j1 + (o1 + p1)*q1*n1</i>       | 4,430,000  | 125,000 | 93,750  | 0       | 450,000 |
|                           | No of people (j1)                                               | 4          | 2       | 1       | n/a     | 1       |
|                           | No of working days (k1)                                         | 40         | 20      | 30      | n/a     | 45      |
|                           | Percentage time spent on vaccination (l1)                       | 0.5        | 0.375   | 0.375   | n/a     | 0.75    |

|  |                         |        |       |       |     |        |
|--|-------------------------|--------|-------|-------|-----|--------|
|  | Daily salary (m1)       | 10,000 | 8,333 | 8,333 | n/a | 13,333 |
|  | <i>Reporting cost</i>   |        | n/a   | n/a   | n/a | n/a    |
|  | No of people (n1)       | 11     | n/a   | n/a   | n/a | n/a    |
|  | Per dem (o1)            | 5,000  | n/a   | n/a   | n/a | n/a    |
|  | Daily salary (p1)       | 10,000 | n/a   | n/a   | n/a | n/a    |
|  | No of working days (q1) | 22     | n/a   | n/a   | n/a | n/a    |

**Table S11.** Vaccine cost calculation details

| Vaccine distribution level | Central            | Regional | Provincial | Communal | Private vets |
|----------------------------|--------------------|----------|------------|----------|--------------|
| <i>Total cost = a * b</i>  | <i>105,846,022</i> | <i>0</i> | <i>0</i>   | <i>0</i> | <i>0</i>     |
| Unit dose cost (a)         | 23.81              | n/a      | n/a        | n/a      | n/a          |
| Number of doses used (b)   | 4,445,444          | 234,122  | 60,888     | 11,191   | 84,272       |

**Table S12.** Material and logistic cost calculation details

| Vaccine distribution level                                                                                       |                                                                         | Central    | Regional   | Provincial | Communal  | Private vets |
|------------------------------------------------------------------------------------------------------------------|-------------------------------------------------------------------------|------------|------------|------------|-----------|--------------|
| Material and logistic = sub total1 + sub total2 + sub total3 + sub total4 + sub total5 + sub total6 + sub total7 |                                                                         | 12,559,963 | 109,722    | 142,014    | 101,635   | 530,464      |
| For vaccine transportation                                                                                       | $Sub\ total1 = a/(360*b)*c*d + h + e/(360*f)*g*h$                       | 333,333    | 13,889     | 27,778     | 38,751    | 241,673      |
|                                                                                                                  | Mean of transportation price (a)                                        | 50,000,000 | 25,000,000 | 25,000,000 | 1,500,000 | 1,500,000    |
|                                                                                                                  | Mean of transportation ULY (b)                                          | 5          | 5          | 5          | 5         | 5            |
|                                                                                                                  | No of days of transportation (c)                                        | 12         | 1          | 1          | 0.5       | 1            |
|                                                                                                                  | Supply number (d)                                                       | 1          | 1          | 2          | 3         | 2            |
|                                                                                                                  | Motorbike price (e)                                                     | 1          | 1          | 1          | 1,500,000 | 1,500,000    |
|                                                                                                                  | Motorbike ULY (f)                                                       | 1          | 1          | 1          | 5         | 5            |
|                                                                                                                  | No of days of transportation in the field (g)                           | n/a        | n/a        | n/a        | 45        | 48           |
|                                                                                                                  | No of vaccination teams (h)                                             | n/a        | n/a        | n/a        | 1         | 6            |
| For vaccine storage                                                                                              | $Sub\ total2 = j/(360*k)*i*l*m + o/(360*p)*n*s + q/(360*r)*s$           | 4,575,000  | 22,222     | 13,889     | 19,109    | 40,023       |
|                                                                                                                  | Cold room number (i)                                                    | 2          | n/a        | n/a        | n/a       | n/a          |
|                                                                                                                  | Cold room building cost (j)                                             | 25,000,000 | n/a        | n/a        | n/a       | n/a          |
|                                                                                                                  | Cold room ULY (k)                                                       | 10         | n/a        | n/a        | n/a       | n/a          |
|                                                                                                                  | Cold room storage time in days (l)                                      | 360        | n/a        | n/a        | n/a       | n/a          |
|                                                                                                                  | Cold room percentage of use (m)                                         | 0.9        | n/a        | n/a        | n/a       | n/a          |
|                                                                                                                  | Refrigerator number (n)                                                 | 1          | 2          | 1          | 1         | 2            |
|                                                                                                                  | Refrigerator price (o)                                                  | 1,500,000  | 500,000    | 500,000    | 500,000   | 500,000      |
|                                                                                                                  | Refrigerator ULY (p)                                                    | 5          | 5          | 5          | 5         | 5            |
|                                                                                                                  | Gas bottle price (q)                                                    | 0          | 0          | 0          | 17,500    | 17,500       |
|                                                                                                                  | Gas bottle ULY (r)                                                      | 1          | 1          | 1          | 3         | 3            |
|                                                                                                                  | Refrigerator storage time (s)                                           | 90         | 40         | 50         | 65        | 70           |
| For vaccine field delivery                                                                                       | $Sub\ total3 = c1/d1 + e1/f1 + g1/h1 + i1/j1)*m1 + (k1/(360*l1))*n1*a1$ | 0          | 0          | 0          | 37108     | 220227       |
|                                                                                                                  | No of vaccination teams (a1)                                            | n/a        | n/a        | n/a        | 1         | 6            |
|                                                                                                                  | No of people per team (b1)                                              | n/a        | n/a        | n/a        | 2         | 2            |

|                           |                                                                     |            |            |            |           |           |
|---------------------------|---------------------------------------------------------------------|------------|------------|------------|-----------|-----------|
|                           | Vaccination syringe price (c1)                                      | n/a        | n/a        | n/a        | 30,000    | 30,000    |
|                           | No of doses supported (d1)                                          | n/a        | n/a        | n/a        | 15,000    | 25,000    |
|                           | Needle price (e1)                                                   | n/a        | n/a        | n/a        | 250       | 250       |
|                           | No of doses supported (f1)                                          | n/a        | n/a        | n/a        | 1,000     | 1,000     |
|                           | Spare glass price (g1)                                              | n/a        | n/a        | n/a        | 3,000     | 3,000     |
|                           | No of doses supported (h1)                                          | n/a        | n/a        | n/a        | 10,000    | 5,000     |
|                           | Marking clamp (i1)                                                  | n/a        | n/a        | n/a        | 10,000    | 10,000    |
|                           | No of animal supported (j1)                                         | n/a        | n/a        | n/a        | 20,000    | 20,000    |
|                           | Cold box price (k1)                                                 | n/a        | n/a        | n/a        | 71,420    | 20,000    |
|                           | Cold box ULY (l1)                                                   | n/a        | n/a        | n/a        | 3         | 3         |
|                           | No of animal vaccinated (m1)                                        | 4,445,444  | 234,122    | 60,888     | 11,191    | 84,272    |
|                           | No of days of work per team (n1)                                    | 40         |            |            | 45        | 48        |
| For sensitization         | <i>Sub total4 = p1/(360*q1)*r1*o1 + s1</i>                          | 2,695,556  | 0          | 27,778     | 6,667     | 10,833    |
|                           | No of sessions (o1)                                                 | 1          |            | 2          | 8         | 13        |
|                           | Mean of transportation price (p1)                                   | 50,000,000 | 25,000,000 | 25,000,000 | 1,500,000 | 1,500,000 |
|                           | Mean of transportation ULY (q1)                                     | 5          |            | 5          | 5         | 5         |
|                           | Mean of transportation number (r1)                                  | 38         | 0          | 1          | 1         | 1         |
|                           | Other material cost (s1)                                            | 1,640,000  | 0          | 0          | 0         | 0         |
| For supervision           | <i>Sub total5 = v1/(360*w1)*u1*t1</i>                               | 833,333    | 69,444     | 69,444     | 0         | 8,333     |
|                           | No of days (t1)                                                     | 5          | 1          | 1          | n/a       | 1         |
|                           | No of sessions (u1)                                                 | 6          | 5          | 5          | n/a       | 10        |
|                           | Mean of transportation price (v1)                                   | 50,000,000 | 25,000,000 | 25,000,000 | n/a       | 1,500,000 |
|                           | Mean of transportation ULY (w1)                                     | 5          | 5          | 5          | n/a       | 5         |
| For training and meetings | <i>Sub total6 = a2 + b2/(360*f2)*e2*c2 + g2 + h2/(360*k2)*j2*i2</i> | 4,093,111  | 0          | 0          | 0         | 0         |
|                           | <i>Review workshop</i>                                              |            | n/a        | n/a        | n/a       | n/a       |
|                           | Material (a2)                                                       | 2,730,000  | n/a        | n/a        | n/a       | n/a       |
|                           | Mean of transportation price (b2)                                   | 50,000,000 | n/a        | n/a        | n/a       | n/a       |
|                           | No of days (c2)                                                     | 2          | n/a        | n/a        | n/a       | n/a       |
|                           | Mean of transportation number (e2)                                  | 13         | n/a        | n/a        | n/a       | n/a       |

|                  |                                           |            |         |         |     |         |
|------------------|-------------------------------------------|------------|---------|---------|-----|---------|
|                  | Mean of transportation ULY (f2)           | 5          | n/a     | n/a     | n/a | n/a     |
|                  | <i>Animal marking training</i>            |            | n/a     | n/a     | n/a | n/a     |
|                  | Material (g2)                             | 252,000    | n/a     | n/a     | n/a | n/a     |
|                  | Mean of transportation price (h2)         | 50,000,000 | n/a     | n/a     | n/a | n/a     |
|                  | No of days (i2)                           | 14         | n/a     | n/a     | n/a | n/a     |
|                  | Mean of transportation number (j2)        | 1          | n/a     | n/a     | n/a | n/a     |
|                  | Mean of transportation ULY (k2)           | 5          | n/a     | n/a     | n/a | n/a     |
| For coordination | <i>Sub total7= o2/(360*p2)*l2*m2*n2</i>   | 29,630     | n/a     | n/a     | n/a | n/a     |
|                  | No of people (l2)                         | 4          | 2       | 1       |     | 1       |
|                  | No of working days (m2)                   | 40         | 20      | 30      |     | 45      |
|                  | Percentage time spent on vaccination (n2) | 0.5        | 0.375   | 0.375   |     | 0.75    |
|                  | Computer price (o2)                       | 400,000    | 300,000 | 300,000 |     | 300,000 |
|                  | Computer ULY (p2)                         | 3          | 3       | 3       | 3   | 3       |

**Table S13.** Overhead calculation details

| Vaccine distribution level                                                              |                                                                                     | Central    | Regional | Provincial | Communal | Private vets |
|-----------------------------------------------------------------------------------------|-------------------------------------------------------------------------------------|------------|----------|------------|----------|--------------|
| Overheads = sub total1 + sub total2 + sub total3 + sub total4 + sub total5 + sub total6 |                                                                                     | 58,328,343 | 167,964  | 121,917    | 202,709  | 1,183,517    |
| For vaccine transportation                                                              | $Sub\ total1 = e + (f + g + h) * c * a + b * k + i * l * m + j * l * m + d * c * a$ | 14,140,120 | 53,833   | 24,367     | 91,800   | 668,600      |
|                                                                                         | Supply number (a)                                                                   | 1          | 1        | 2          | 3        | 2            |
|                                                                                         | Importing cost (b)                                                                  | 2.45       | 0        | 0          | 0        | 0            |
|                                                                                         | Number of days of transportation (c)                                                | 12         | 1        | 1          | 0.5      | 1            |
|                                                                                         | Mean of transportation daily maintenance cost (d)                                   | 4,167      | 833      | 833        | 200      | 150          |
|                                                                                         | Fuel cost (e)                                                                       | 2,052,540  | 50,000   | 20,000     | 3,000    | 44,000       |
|                                                                                         | Tool fees (f)                                                                       | 0          | 1,000    | 400        | 0        | 800          |
|                                                                                         | Ice cost (g)                                                                        | 0          | 1,500    | 200        | 0        | 500          |
|                                                                                         | Phone call cost per day for transportation (h)                                      | 1,000      | 500      | 750        | 500      | 1,250        |
|                                                                                         | Fuel cost per day for field transportation (i)                                      | n/a        | n/a      | 0          | 1,750    | 2,000        |
|                                                                                         | Field mean of transportation daily maintenance cost (j)                             | n/a        | n/a      | 0          | 200      | 150          |
|                                                                                         | Number of doses transported (k)                                                     | 4,908,400  | 292,775  | 63,150     | 12,017   | 85,000       |
|                                                                                         | No of days of transportation in the field (l)                                       | n/a        | n/a      | n/a        | 45       | 48           |
|                                                                                         | No of vaccination teams (m)                                                         | n/a        | n/a      | n/a        | 1        | 6            |
| For vaccine storage                                                                     | $Sub\ total2 = n * o * p * q + u + (v/30) * t + s * t * r$                          | 18,899,285 | 8,381    | 5,238      | 32,809   | 47,527       |
|                                                                                         | Cold room number (n)                                                                | 2          | n/a      | n/a        | n/a      | n/a          |
|                                                                                         | Cold room maintenance daily cost (o)                                                | 1,667      | n/a      | n/a        | n/a      | n/a          |
|                                                                                         | Cold room storage time in days (p)                                                  | 360        | n/a      | n/a        | n/a      | n/a          |
|                                                                                         | Percentage of use for PPR vaccine storage (q)                                       | 0.9        | n/a      | n/a        | n/a      | n/a          |
|                                                                                         | Refrigerator number (r)                                                             | 1          | 2        | 1          | 1        | 2            |
|                                                                                         | Refrigerator maintenance daily cost (2.5%) (s)                                      | 104        | 0        | 0          | 0        | 35           |
|                                                                                         | Refrigerator storage time in days (t)                                               | 90         | 40       | 50         | 65       | 70           |
|                                                                                         | Power cost (u)                                                                      | 17,809,910 | 8,381    | 5,238      | 6,809    | 14,666       |
|                                                                                         | Gas recharging cost per month (v)                                                   | 0          | 0        | 0          | 12,000   | 12,000       |

|                            |                                                         |            |        |        |        |         |
|----------------------------|---------------------------------------------------------|------------|--------|--------|--------|---------|
| For vaccine field delivery | <i>Sub total3 = z + y*x*w</i>                           | 0          | 0      | 0      | 40,500 | 90,200  |
|                            | No of vaccination teams (w)                             | n/a        | n/a    | n/a    | 1      | 6       |
|                            | No of working days per team (x)                         | n/a        | n/a    | n/a    | 45     | 48      |
|                            | Icebox price per day (y)                                | n/a        | n/a    | n/a    | 150    | 275     |
|                            | Phone call (z)                                          | n/a        | n/a    | n/a    | 33,750 | 11,000  |
| For sensitization          | <i>Sub total4 = b1*a1+c1*a1+d1*f1*a1+e1</i>             | 16,400,300 | 0      | 21,500 | 37,600 | 251,450 |
|                            | No of session (a1)                                      | 1          | n/a    | 2      | 8      | 13      |
|                            | Phone call per session (b1)                             | 100,000    | n/a    | 0      | 500    | 1,500   |
|                            | Fuel cost (c1)                                          | 2,822,000  | n/a    | 10,000 | 2,000  | 5,000   |
|                            | Mean of transportation maintenance cost (15%) (d1)      | 11,139     | n/a    | 750    | 200    | 150     |
|                            | Media broadcast costs (e1)                              | 13,055,000 | n/a    | 0      | 16,000 | 165,000 |
|                            | Mean of transportation number (f1)                      | 38         | n/a    | 1      | 1      | 1       |
| For supervision            | <i>Sub total5 (central) = h1*g1*j1+i1+k1+l1</i>         | 2,822,028  | 79,750 | 44,813 | 0      | 36,500  |
|                            | <i>Sub total5 (others) = h1*g1*j1+i1*j1+k1+l1*j1*g1</i> |            |        |        |        |         |
|                            | No of days (g1)                                         | 5          | 1      | 1      | n/a    | 1       |
|                            | Phone call cost per day (h1)                            | 2,057      | 1,000  | 1,200  | n/a    | 1,000   |
|                            | Fuel cost (i1)                                          | 2,052,450  | 13,000 | 6,750  | n/a    | 2,500   |
|                            | No of session (j1)                                      | 6          | 5      | 5      | n/a    | 10      |
|                            | Vaccine shipment (k1)                                   | 400,000    | 0      | 0      | n/a    | 0       |
|                            | Mean of transportation maintenance cost (15%) (l1)      | 307,868    | 1,950  | 1,013  | n/a    | 150     |
| For training and meetings  | <i>Sub total6 = m1+n1+o1+p1+q1+r1+s1+t1+u1</i>          | 6,016,610  | 0      | 0      | 0      | 0       |
|                            | <i>Review workshop</i>                                  |            | n/a    | n/a    | n/a    | n/a     |
|                            | Phone call cost (m1)                                    | 200,000    | n/a    | n/a    | n/a    | n/a     |
|                            | Fuel cost (n1)                                          | 1,986,000  | n/a    | n/a    | n/a    | n/a     |
|                            | Room rent (o1)                                          | 0          | n/a    | n/a    | n/a    | n/a     |
|                            | Media broad cast costs (p1)                             | 1,000,000  | n/a    | n/a    | n/a    | n/a     |
|                            | Mean of transportation maintenance cost (15%) (q1)      | 297,900    | n/a    | n/a    | n/a    | n/a     |
|                            | <i>Animal marking training</i>                          |            | n/a    | n/a    | n/a    | n/a     |
|                            | Phone call (r1)                                         | 32,000     | n/a    | n/a    | n/a    | n/a     |



|                  |                                                    |               |               |               |          |               |
|------------------|----------------------------------------------------|---------------|---------------|---------------|----------|---------------|
|                  | Fuel cost (s1)                                     | 1,935,400     | n/a           | n/a           | n/a      | n/a           |
|                  | Room rent (t1)                                     | 275,000       | n/a           | n/a           | n/a      | n/a           |
|                  | Mean of transportation maintenance cost (15%) (u1) | 290,310       | n/a           | n/a           | n/a      | n/a           |
| For coordination | <i>Sub total7 = e2+j2+d2+f2*g2*a2+h2*i2*a2</i>     | <i>50,000</i> | <i>26,000</i> | <i>26,000</i> | <i>0</i> | <i>89,240</i> |
|                  | Campaign duration (a2)                             | 90            | 90            | 90            | n/a      | 60            |
|                  | No of people (b2)                                  | 4             | 2             | 1             | n/a      | 1             |
|                  | No of working days (c2)                            | 40            | 20            | 30            | n/a      | 45            |
|                  | Transport cost (d2)                                | 0             | 6,000         | 10,000        | n/a      | 14985         |
|                  | Communication cost (e2)                            | 50,000        |               | 5,000         | n/a      | 10,000        |
|                  | Room rent (f2)                                     | 0             | 0             | 0             | n/a      | 2,067         |
|                  | PPR vaccination part (g2)                          | 0             | 0             | 0             | n/a      | 0.25          |
|                  | Taxes dues (h2)                                    | 0             | 0             | 0             | n/a      | 1,250         |
|                  | PPR vaccination part (i2)                          | 0             | 0             | 0             | n/a      | 0.18          |
|                  | Reporting phone call cost (j2)                     | 0             | 20,000        | 11,000        | n/a      | 19,750        |

**Table S14.** Vaccine wastage cost calculation details

| Vaccine distribution level   | Central   | Regional  | Provincial | Communal | Private vets |
|------------------------------|-----------|-----------|------------|----------|--------------|
| Total cost = a3-b3-c3        | 8,755,675 | 1,396,528 | 53,858     | 19,667   | 17,334       |
| No of doses delivered (a3)   | 7,356,800 | 300,100   | 65,000     | 12,725   | 85,000       |
| No of vaccinated animal (b3) | 4,445,444 | 234,122   | 60,888     | 11,191   | 84,272       |
| No of doses available (c3)   | 2,448,400 | 7,325     | 1,850      | 708      | 0            |
