# Supplementary material for: Peste des Petits Ruminants (PPR) Vaccination Cost Estimates in Burkina Faso
Source: MDPI journal article supplement (doi:10.3390/ani12162152), 2022-08-22
Supplement: s1 [file s1]

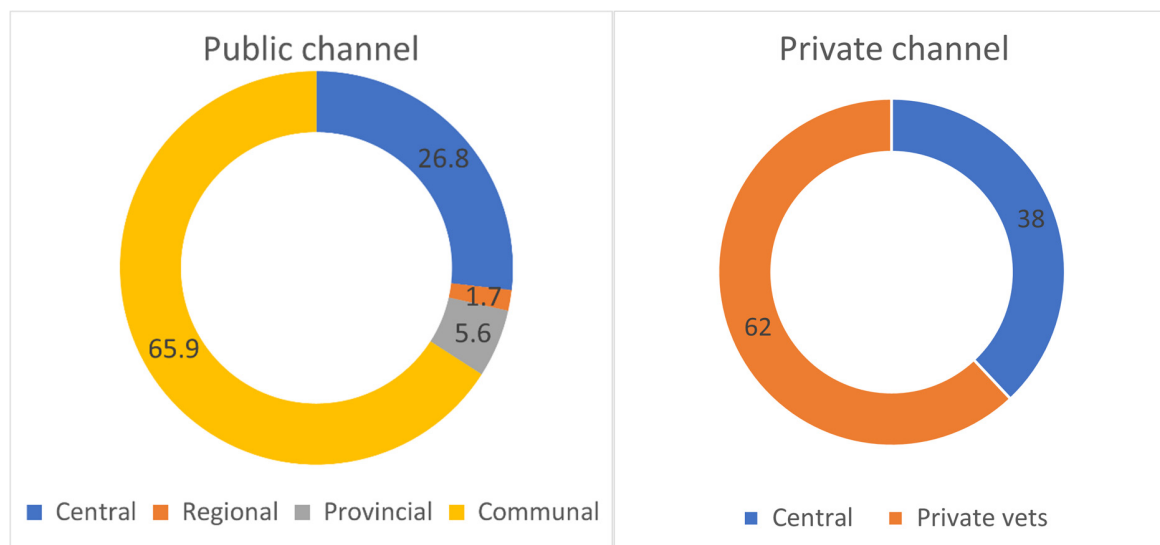

**Figure S4.** Percentage contribution of level distribution to PPR vaccination cost in public and private distribution channels in Burkina Faso in 2020
